# Supplementary material for: AIRR Community Standardized Representations for Annotated Immune Repertoires
Source: PubMed Central journal article supplement (PMC6173121; doi:10.3389/fimmu.2018.02206), 2018-09-28
Supplement: Data_Sheet_2.pdf [file Data_Sheet_2.pdf]

# AIRR Community Standardized Representations for Annotated Immune Repertoires

Jason A. Vander Heiden\*, Susanna Marquez, Nishanth Marthandan, Syed Ahmad Chan Bukhari, Christian E. Busse, Brian Corrie, Uri Hershberg, Steven H. Kleinstein, Frederick A. Matsen IV, Duncan K. Ralph, Aaron M. Rosenfeld, Chaim A. Schramm, The AIRR Community, Scott Christley\*<sup>†</sup> and Uri Laserson<sup>†</sup>

## List of AIRR Community members endorsing this manuscript

| <b>Name</b>              | <b>Affiliation</b>                                                                                                                                                   |
|--------------------------|----------------------------------------------------------------------------------------------------------------------------------------------------------------------|
| Abdellali Kelil          | Donnelly Centre for Cellular and Biomolecular Research, University of Toronto, Toronto, Canada                                                                       |
| Adam Buntzman            | Bio5 Institute, University of Arizona, Tucson, USA                                                                                                                   |
| Adrian J Shepherd        | Biological Sciences, Birkbeck, University of London, London, UK                                                                                                      |
| Alexander Rosenberg      | Microbiology, University of Alabama at Birmingham, Birmingham, USA                                                                                                   |
| Andrew Collins           | School of Biotechnology and Biomolecular Sciences, University of New South Wales, Sydney, Australia                                                                  |
| Anne Eugster             | Center for Regenerative Therapies, TU Dresden , Dresden, Germany                                                                                                     |
| Barbera D. C. van Schaik | Bioinformatics Laboratory, Clinical Epidemiology, Biostatistics and Bioinformatics, Academic Medical Center, Amsterdam, The Netherlands                              |
| Bjoern Peters            | Division of Vaccine Discovery, La Jolla Institute for Allergy and Immunology, La Jolla, USA                                                                          |
| Brian Corrie             | Department of Biological Sciences, Simon Fraser University, Burnaby, Canada                                                                                          |
| Brian G. Pierce          | Department of Cell Biology and Molecular Genetics, University of Maryland Institute for Bioscience and Biotechnology Research, Rockville, USA                        |
| Camila Coelho            | National Institute of Allergy and Infectious Diseases, National Institutes of Health, Rockville, USA                                                                 |
| Cathrine Scheepers       | Centre for HIV and STIs and Department of Virology, National Institute for Communicable Diseases and The University of the Witwatersrand, Johannesburg, South Africa |
| Christopher Dubay        | Earle A. Chiles Research Institute, Providence Cancer Center, Portland, USA                                                                                          |
| Corey T. Watson          | Biochemistry and Molecular Genetics, University of Louisville School of Medicine, Louisville, USA                                                                    |
| Daisuke Komura           | Department of Genomic Pathology, Tokyo Medical and Dental University, Tokyo, Japan                                                                                   |
| Daniel Douek             | Vaccine Research Center, National Institutes of Health, Bethesda, USA                                                                                                |
| David Krag               | Department of Surgery, University of Vermont, Burlington, USA                                                                                                        |
| Davide Bagnara           | Department of Experimental Medicine, University of Genoa, Genoa, Italy                                                                                               |
| Donald Lee               | Biotechnology HPC Software Applications Institute, Frederick, USA                                                                                                    |

|                           |                                                                                                                                                            |
|---------------------------|------------------------------------------------------------------------------------------------------------------------------------------------------------|
| Duncan Ralph              | Computational Biology Department, Fred Hutchinson Cancer Research Center, Seattle, USA                                                                     |
| Eline Luning Prak         | Pathology and Laboratory Medicine, Perelman School of Medicine, University of Pennsylvania, Philadelphia, USA                                              |
| Enkelejda Miho            | Institute for Medical and Analytical Technologies, University of Applied Sciences and Arts Northwestern Switzerland, Muttenz, Switzerland                  |
| Felix Breden              | Department of Biological Sciences, Simon Fraser University, Burnaby, Canada                                                                                |
| Florian Rubelt            | Department of Microbiology and Immunology and Institute for Immunity, Transplantation and Infection, Stanford University School of Medicine, Stanford, USA |
| George Blanck             | Molecular Medicine, Morsani College of Medicine, University of South Florida, Tampa, USA                                                                   |
| Gunilla Karlsson Hedestam | Microbiology, Tumor and Cell Biology, Karolinska Institutet, Stockholm, Sweden                                                                             |
| Gur Yaari                 | Faculty of engineering, Bar-Ilan University, Ramat Gan, Israel                                                                                             |
| Hiroto Katoh              | Department of Genomic Pathology, Tokyo Medical and Dental University, Tokyo, Japan                                                                         |
| Ignacio Sanz              | Department of Medicine, Emory School of Medicine, Atlanta, USA                                                                                             |
| Jacob D. Galson           | Kymab Ltd, Cambridge, UK                                                                                                                                   |
| Jacob S. Sherkow          | Innovation Center for Law and Technology, New York Law School, New York, USA                                                                               |
| Jamie Scott               | Department of Molecular Biology and Biochemistry, Simon Fraser University, Burnaby, Canada                                                                 |
| Jean-Philippe Bürckert    | BISC Global Inc., Boston, USA                                                                                                                              |
| Johanna Olweus            | Department of Cancer Immunology, Institute for Cancer Research, Oslo University Hospital and the University of Oslo, Oslo, Norway                          |
| Johannes Trüch            | Division of Immunology, University Children's Hospital Zurich, Zurich, Switzerland                                                                         |
| Lindsay Cowell            | Department of Clinical Sciences, UT Southwestern, Dallas, Texas, USA                                                                                       |
| Ludvig M. Sollid          | Department of Immunology, University of Oslo, Oslo, Norway                                                                                                 |
| Mangul Serghei            | Institute for Quantitative and Computational Biosciences, University of California, Los Angeles, Los Angeles, USA                                          |
| Marcelo Brigido           | Cellular Biology, University of Brasilia, Brasilia, Brazil                                                                                                 |
| Masahide Yano             | Center for Drug Evaluation and Research, US Food and Drug Administration, Silver Spring, USA                                                               |
| Mats Ohlin                | Department of Immunotechnology, Lund University, Lund, Sweden                                                                                              |
| Mikhail Shugay            | Center of Life Sciences, Skolkovo Institute of Science and Technology, Moscow, Russia                                                                      |
| Nima Nouri                | Department of Pathology, Yale School of Medicine, New Haven, USA                                                                                           |
| Ning Jiang                | Biomedical Engineering, University of Texas at Austin, Austin, USA                                                                                         |

|                    |                                                                                                    |
|--------------------|----------------------------------------------------------------------------------------------------|
| Peng Qiu           | Biomedical Engineering, Georgia Institute of Technology and Emory University, Atlanta, USA         |
| Ramit Mehr         | The Mina & Everard Goodman Faculty of Life Sciences, Bar-Ilan University, Ramat-Gan, Israel        |
| Rasmi Thomas       | US Military HIV Research Program, Walter Reed Army Institute of Research, Silver Spring, USA       |
| Robert Cook-Deegan | School for the Future of Innovation in Society, Arizona State University, Tempe, USA               |
| Samuel O. Oyola    | Animal and Human health Immunogenetics, International Livestock Research Institute, Nairobi, Kenya |
| Simon DW Frost     | Department of Veterinary Medicine, University of Cambridge, Cambridge, UK                          |
| Sol Efroni         | Faculty of Life Sciences, Bar-Ilan University, Ramat Gan, Israel                                   |
| Thomas MacCarthy   | Applied Math and Statistics, Stony Brook University, Stony Brook, USA                              |
| Victor Greiff      | Department of Immunology, University of Oslo, Oslo, Norway                                         |
| William D Lees     | Biological Sciences, Birkbeck, University of London, London, UK                                    |
| William J Faison   | Duke Human Vaccine Institute, Duke University School of Medicine, Durham, USA                      |
| Xiao Liu           | BGI-Shenzhen, Shenzhen, China                                                                      |
| Zhang Shifang      | AbHelix, LLC, New Jersey, USA                                                                      |
